# Supplementary material for: A Unified Multievent Windstorm Performance Testbed for Single-Family Residential Buildings
Source: Atypon-hosted journal article supplement (doi:10.1061/nhrefo.nheng-1796), 2023-12-30
Supplement: supplemental_materials_nhrefo.nheng-1796_roueche.pdf [file supplemental_materials_nhrefo.nheng-1796_roueche.pdf]

## SUPPLEMENTAL MATERIALS

*ASCE Natural Hazards Review*

# A Unified Multievent Windstorm Performance Testbed for Single-Family Residential Buildings

David B. Roueche, Jordan O. Nakayama, Tracy Kijewski-Correa,  
and David O. Prevatt

**DOI:** 10.1061/NHREFO.NHENG-1796

© ASCE 2023

[www.ascelibrary.org](http://www.ascelibrary.org)

The following statistical information is provided for select figures.

Table S1. 25<sup>th</sup>, 50<sup>th</sup>, and 75<sup>th</sup> percentile statistics for various features of the Windstorm Performance Database (WiSPD).

| Figure Reference                                    | 25 <sup>th</sup> Percentile | Median | 75 <sup>th</sup> Percentile |
|-----------------------------------------------------|-----------------------------|--------|-----------------------------|
| Figure 3(a) Year Built                              | 1976                        | 1992   | 2006                        |
| Figure 3(b) First Floor Elevation (m)               | 0                           | 0      | 0                           |
| Figure 3 (c) Number of Stories                      | 1                           | 1      | 1.5                         |
| Figure 5(a) Estimated Wind Speeds: All Storms (m/s) | 47.11                       | 51.54  | 59.41                       |
| Figure 5(b) Estimated Wind Speeds: Tornadoes (m/s)  | 37.99                       | 49.17  | 49.17                       |
| Figure 5(c) Estimated Wind Speeds: Hurricanes (m/s) | 49.91                       | 57.10  | 59.41                       |
| Figure 6(a) Basic Wind Speeds: ASCE 7-05 (m/s)      | 40.23                       | 54.98  | 58.11                       |
| Figure 6(b) Basic Wind Speeds: ASCE 7-10 (m/s)      | 51.41                       | 59.45  | 65.71                       |
| Figure 6(c) Basic Wind Speeds: ASCE 7-16 (m/s)      | 47.83                       | 59.45  | 65.71                       |
| Figure 7(a) Wind Speed Ratio: All Storms            | 0.81                        | 0.99   | 1.18                        |
| Figure 7(b) Wind Speed Ratio: Tornadoes             | 0.94                        | 1.22   | 1.22                        |
| Figure 7(c) Wind Speed Ratio: Hurricanes            | 0.77                        | 0.98   | 1.04                        |
